# Supplementary material for: Microwave-assisted synthesis of dual responsive luminomagnetic rare earth metal ions (Nd3+, Dy3+) co-doped nanohydroxyapatite for biomedical applications
Source: Royal Society of Chemistry journal article supplement (doi:10.1039/d4dt02664k), 2025-01-01
Supplement: d4dt02664k1.pdf [file d4dt02664k1.pdf]

**Electronic Supplementary Information**  
**Microwave-assisted synthesis of dual responsive  $\text{pH}$ -responsive  
nanohydroxyapatite for biomedical applications**

**Mohammad Irfan,<sup>a</sup> Ashok Jeshurun,<sup>b</sup> Bogala Mallikharjuna Reddy<sup>\*c1</sup>**

<sup>a</sup>Department of Chemical Engineering, Indian Institute of Technology Tirupati, AP, 517619, India.

<sup>b</sup>Department of Mechanical Engineering, Indian Institute of Technology Madras, TN,  
600036, India.

<sup>c</sup>Center for Research, Innovation, Development, and Applications, Jaiotec Labs (OPC)  
Private Limited, Amaravati, AP, 522503, India.

## S 1. Fourier transform infrared spectroscopy

The FT-IR spectra of HAp, Nd:HAp, Dy:HAp, and Nd:Dy:HAp samples were acquired, from  $400\text{ cm}^{-1}$  to  $4000\text{ cm}^{-1}$ , to identify the important functional groups ( $\text{PO}_4^{3-}$  and  $\text{OH}^-$ ) present in the chemical structures. The FT-IR spectra of all the HAp samples are displayed in Fig. S1. The spectra displayed the characteristic peaks at  $985\text{--}1098\text{ cm}^{-1}$ ,  $965\text{--}970\text{ cm}^{-1}$ , and  $570\text{--}610\text{ cm}^{-1}$ . They represent the fingerprint regions for vibrational modes of O–P–O bonds, i.e., antisymmetric stretching ( $\nu_3$ ), symmetric stretching ( $\nu_1$ ), and bending ( $\nu_4$ ), that corresponds to the  $\text{PO}_4^{3-}$  of HAp, respectively.<sup>1,2</sup> It was found that the doubly degenerated  $\nu_2$  bending vibration was linked to the peak at  $477\text{ cm}^{-1}$ . The signal detected at  $967\text{ cm}^{-1}$  was attributed to the phosphate group's symmetric stretching mode of  $\nu_1$ .<sup>1,2</sup> The peaks located at  $\sim 1000\text{ cm}^{-1}$  resulted from an asymmetric  $\nu_3$  stretching vibration that was triply degenerated. For the O–P–O bond, the peaks measured at  $\sim 586\text{ cm}^{-1}$  were found to represent a  $\nu_4$  bending mode. The distinctive peak of the hydrogen phosphate group was located in the band at  $878\text{ cm}^{-1}$ .<sup>1,2</sup>

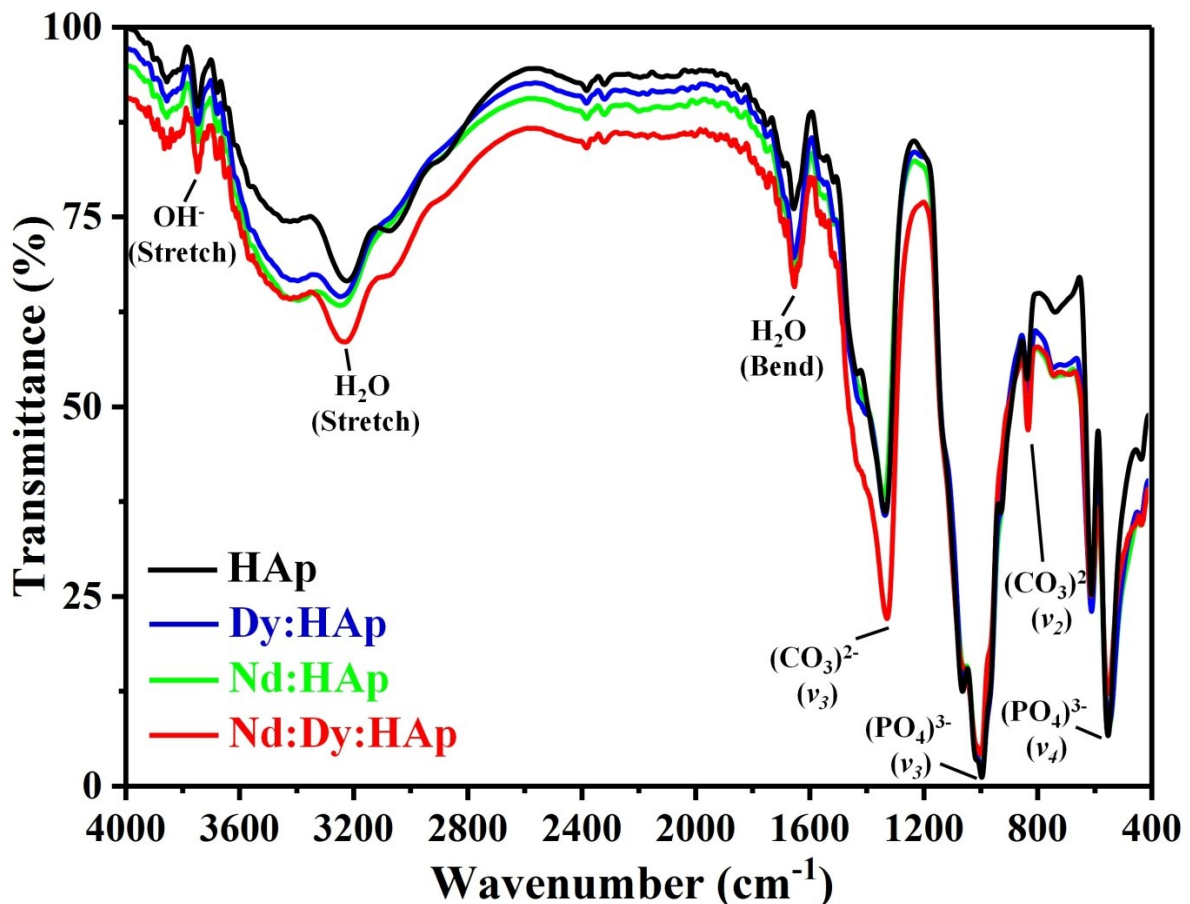

Fig. S1 FT-IR spectra of HAp, Nd:HAp, Dy:HAp, and Nd:Dy:HAp samples.

The  $\text{CO}_3^{2-}$  stretching and bending bands were located at  $\sim 1428\text{ cm}^{-1}$  and  $\sim 825\text{ cm}^{-1}$ ,

respectively. The  $\nu_3$  vibrational mode at 1250-1530  $\text{cm}^{-1}$  indicated the existence of minor amount of carbonate in the sample. The presence of  $\nu_3$  carbonate ions ( $\text{CO}_3^{2-}$ ), which were adsorbed from the atmosphere during the sample preparation, is responsible for the observed FT-IR bands. The lattice  $\text{H}_2\text{O}$ 's  $\nu_2$  bending mode of H-O-H is responsible for a peak at  $\sim 1645 \text{ cm}^{-1}$ .<sup>1,2</sup> The stretching vibrational modes of the crystalline  $\text{OH}^-$  ions were detected as infrared bands at 3675  $\text{cm}^{-1}$ .<sup>1,2</sup> Furthermore, all the samples showed characteristic stretching and bending bands of adsorbed  $\text{H}_2\text{O}$  at 2790-3720  $\text{cm}^{-1}$  & 1590-1750  $\text{cm}^{-1}$ . Except for the bands corresponding to adsorbed  $\text{H}_2\text{O}$  and  $\text{CO}_3^{2-}$ , whose peak intensities altered with RE metal ions doping in HAp), the FT-IR peaks of all the characteristic bands did not alter drastically with the type of RE metal ions present. However, the intensity of vibration bands of Nd:Dy:HAp are strongest among the tested samples. As the RE metals were introduced into HAp, so did the intensity of the hydroxyl group stretching bands (at 2790-3720  $\text{cm}^{-1}$  and 3750-3800  $\text{cm}^{-1}$ ) and the carbonate group stretching bands (at 1250-1530  $\text{cm}^{-1}$ ). The FT-IR data (Table S1) of the examined HAp materials generally show that the peaks correspond to the primary vibrational modes of the HAp structure's phosphate ( $\text{PO}_4^{3-}$ ), adsorbed carbonate ( $\text{CO}_3^{2-}$ ), water (H-O-H), and hydroxyl ( $\text{OH}^-$ ) groups. The bands' enhanced sharpness and intensity slightly when HAp was doped with RE ions, which indicates that there is a change in the crystallinity of HAp due to RE ion doping.<sup>3</sup> Because of the different interactions between the RE metal and other functional groups, the intensity of the characteristic bands enhanced with RE ion doping in the HAp's crystal lattice.

## S2. Raman spectroscopy

Fig. S2 displays an overlay of the Raman spectra of the HAp samples that were measured in the 300  $\text{cm}^{-1}$  – 1100  $\text{cm}^{-1}$  range. The tetrahedral phosphate group of HAp is represented by four distinctive active vibration modes in the Raman shifts of both pure and RE doped HAp. The bending modes ( $\nu_2$  &  $\nu_4$ ) of  $\text{PO}_4^{3-}$  doubly degenerate bending create weak intensity peaks at 390  $\text{cm}^{-1}$  – 480  $\text{cm}^{-1}$  and 530  $\text{cm}^{-1}$  – 690  $\text{cm}^{-1}$ , respectively.<sup>1,2</sup>  $\text{PO}_4^{3-}$  has two stretching modes: a high peak at 925  $\text{cm}^{-1}$  – 985  $\text{cm}^{-1}$  and a faint peak at 1020  $\text{cm}^{-1}$  – 1080  $\text{cm}^{-1}$ . The symmetric stretching mode ( $\nu_1$ ) and the triply degenerate asymmetric stretching mode ( $\nu_3$ ) are involved.<sup>1,2</sup> The Raman signals of the HAp functional groups are displayed in Table S1, alongside the FT-IR peaks. The presence of metal dopants in the HAp structure caused slight peak shifts in the  $\text{PO}_4^{3-}$  bands. It was observed that the intensity of the vibration peak changed as the type of RE ions doped in HAp was altered.<sup>3</sup> The presence of characteristic phosphate functional groups in all the HAp structures was confirmed by the strong correlation between

the results of the Raman and FT-IR spectroscopy.

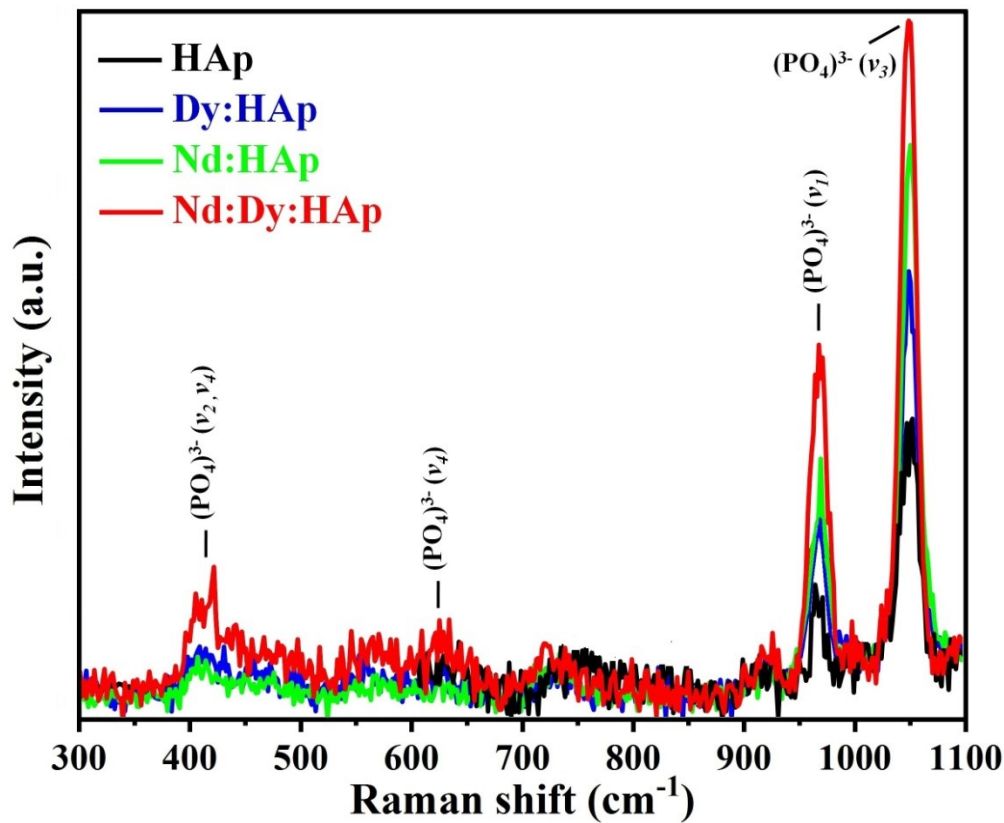

Fig. S2 Raman spectra of HAp, Nd:HAp, Dy:HAp, and Nd:Dy:HAp samples.

Table S1. A summary of FT-IR and Raman spectra peaks of HAp and Nd:Dy:HAP functional groups.

| Spectroscopic | Wavenumber (cm <sup>-1</sup> ) | Functional Groups                                                                          |
|---------------|--------------------------------|--------------------------------------------------------------------------------------------|
| FT-IR         | 475-480                        | Doubly degenerate O–P–O bending ( $\nu_2$ )                                                |
|               | 570-610                        | Triply degenerate O–P–O bending ( $\nu_4$ )                                                |
|               | 965-970                        | Non-degenerate symmetric P–O stretching ( $\nu_1$ )                                        |
|               | 985-1098                       | Triply degenerate asymmetric P–O stretching ( $\nu_3$ )                                    |
|               | 635-740                        | Bending crystalline OH <sup>-</sup>                                                        |
|               | 3750-3800                      | Stretching crystalline OH <sup>-</sup>                                                     |
|               | 2790-3720 & 1590-1750          | Stretching & bending of adsorbed H <sub>2</sub> O                                          |
| Raman         | 1250-1530 & 810-830            | Stretching C–O ( $\nu_3$ ) & bending ( $\nu_2$ ) of adsorbed CO <sub>3</sub> <sup>2-</sup> |
|               | 390-480                        | Doubly degenerate bending, PO <sub>4</sub> <sup>3-</sup> ( $\nu_2$ & $\nu_4$ )             |
|               | 530-690                        | Doubly degenerate bending, PO <sub>4</sub> <sup>3-</sup> ( $\nu_4$ )                       |
|               | 925-985                        | Symmetric stretching, PO <sub>4</sub> <sup>3-</sup> ( $\nu_1$ )                            |
|               | 1020-1080                      | Triply degenerate asymmetric stretching, PO <sub>4</sub> <sup>3-</sup> ( $\nu_3$ )         |

### S3. Atomic force microscopy

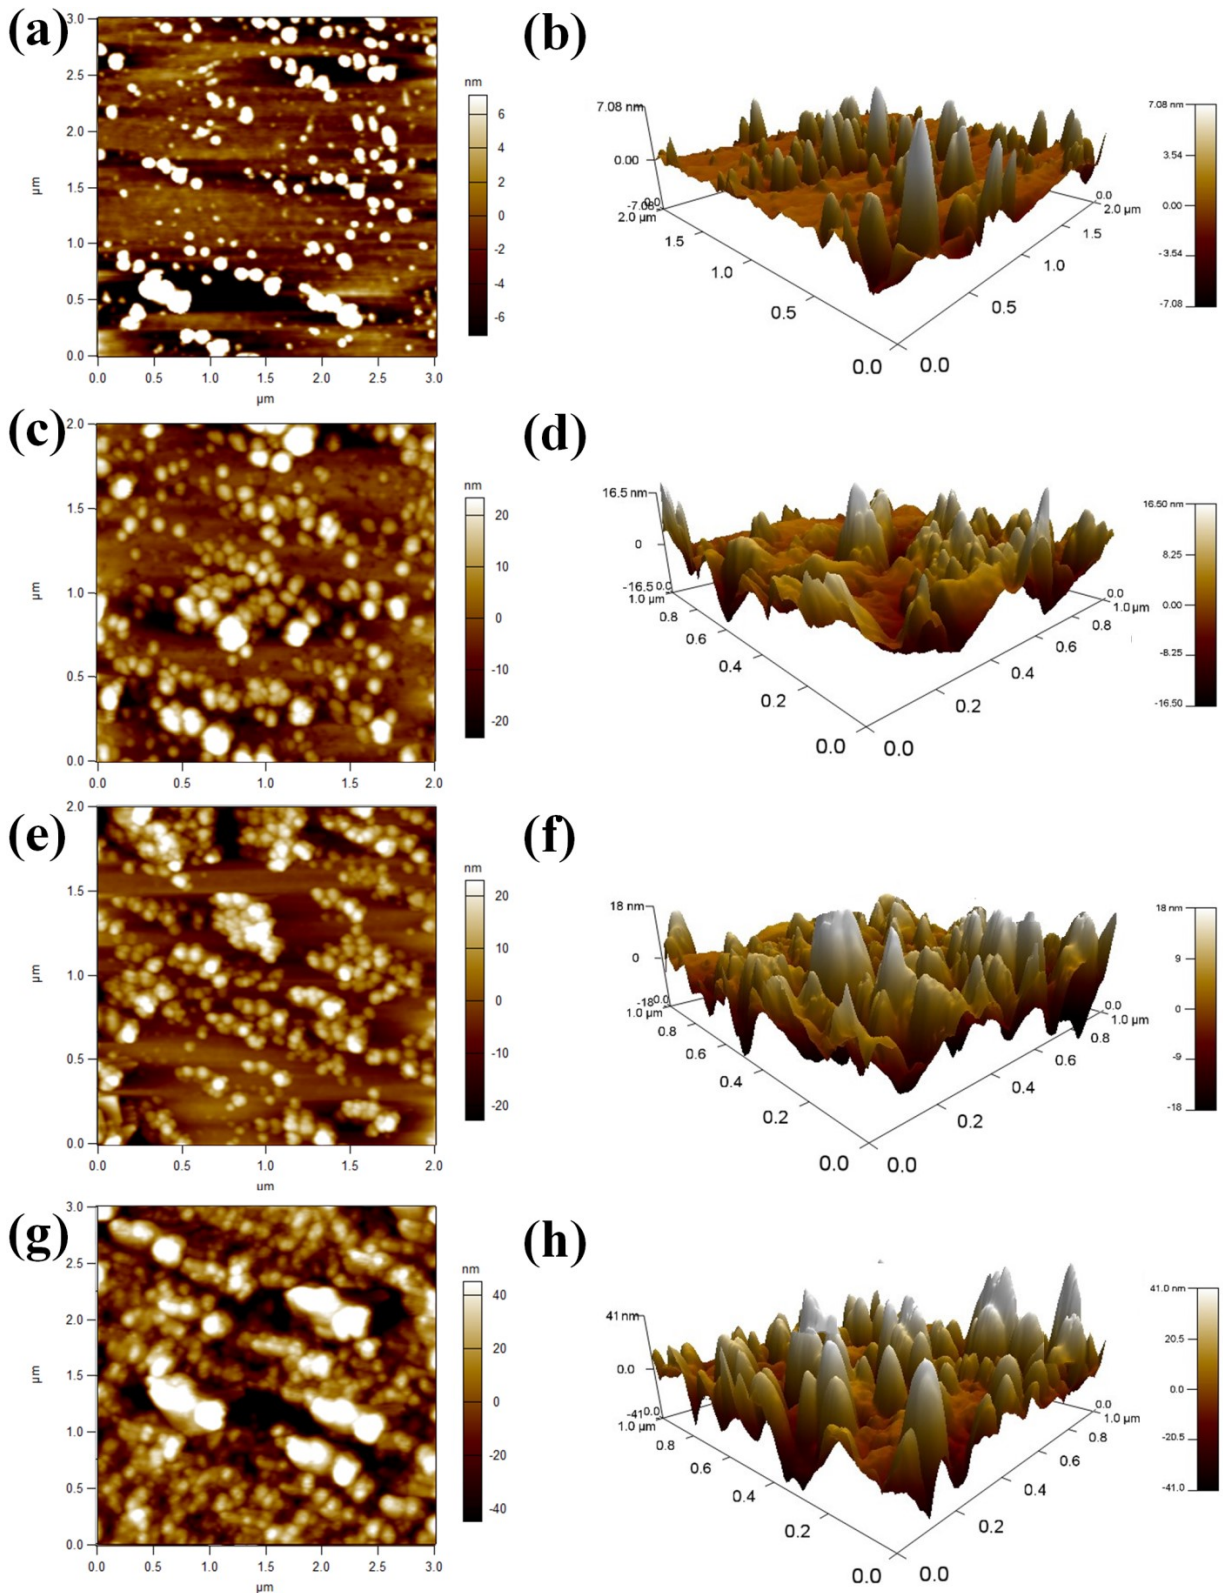

**Fig. S3** AFM images (2D & 3D) of (a, b) HAp, (c, d) Nd:HAp (e, f) Dy:HAp, & (g, h) Nd:Dy:HAp.

Atomic force microscopy (AFM) has been used to examine the surface topography, surface roughness, and surface texture of the HAp, Nd:HAp, Dy:HAp, and Nd:Dy:HAp samples. 2D and 3D AFM images of all the HAp samples are presented in Fig. S3. The AFM findings

demonstrated that all the samples under investigation had uniform morphology. The 2D surface showed that there was no visible indication of fissures or cracks. From the 3D surface, it can be inferred that both HAp and RE doped HAp samples contain uniformly dispersed nanoaggregates. Gwyddion 2.60 software tool was used to calculate the surface roughness or root mean square (RRMS,  $R_q$ , or  $\delta_{RMS}$ ) values of the samples.<sup>4</sup> HAp, Nd:HAp, Dy:HAp, and Nd:Dy:HAp have  $\delta_{RMS}$  values of  $63.83 \pm 14.19$  nm,  $76.60 \pm 17.96$ ,  $70.61 \pm 16.80$ , and  $74.15 \pm 20.99$  nm, respectively. This suggests that HAp's surface is less rough than the RE doped HAp surfaces. The AFM findings are consistent with the SEM studies, which also showed smooth surfaces with no significant cracks and fissures observed in the RE-doped HAp samples.

#### **S4. Thermal analysis**

For various physical or biological applications, a material's capacity to withstand heat shock is crucial. Fig. S4 illustrates the thermal stability studies, i.e., thermogravimetry (TG) and differential thermal analysis (DTA), of HAp, Nd:HAp, Dy:HAp, and Nd:Dy:HAp were performed before the pre-thermal treatment. All the samples were heated at a rate of 5 °C/min, from 40 °C to 980 °C in a nitrogen ( $N_2$ ) gas environment. The variations in TG weight loss is correlated with elevated temperatures to indicate the material's thermal stability.<sup>3</sup> The TG curves of Fig. S4(a) show significant weight reductions of 29.05 %, 27.63 %, 25.45 %, and 22.00 % for HAp, Nd:HAp, Dy:HAp, and Nd:Dy:HAp, respectively. The as-synthesized materials experience mass losses because of oxidation, dehydration, thermal breakdown, and evaporation. Small weight losses (< 5%) below 200 °C are caused by the evaporation of weakly entrapped water molecules from the sample surface.<sup>5</sup> Between 200 °C & 600 °C is when HAp and RE doped HAp undergo the majority of weight losses (20–30%). These TG transitions are associated with the removal of volatile components (solvents, crystalline  $H_2O$ , etc.) from the HAp samples.<sup>5</sup>

As the temperature increases to 600 °C, the TG weight loss altered proportionately with the RE doping of HAp. The TG weight loss of the samples decreased when the RE metals were doped into HAp crystal lattice structure. The thermal stability of HAp is modified by doping with  $Nd^{3+}$  and  $Dy^{3+}$  ions, which catalyzes breakdown reactions at lower temperatures. RE dopants cause the crystal lattice to be disrupted and this alters structural integrity and increases material reactivity. They have the ability to create voids and flaws, which can speed up the rate of decomposition and release volatile substances when heated. The observed



weight loss is a result of several processes working together. At temperatures above 600 °C, there are no appreciable TG weight losses observed in HAp and RE doped HAp, thus suggesting that all the HAp materials remain thermally stable even at higher temperatures. The endothermic or exothermic reactions linked to the materials' dehydration, melting, breakdown, crystallization, oxidation, and glass transition are measured by differential thermal analysis (DTA) of the as-synthesized HAp samples.

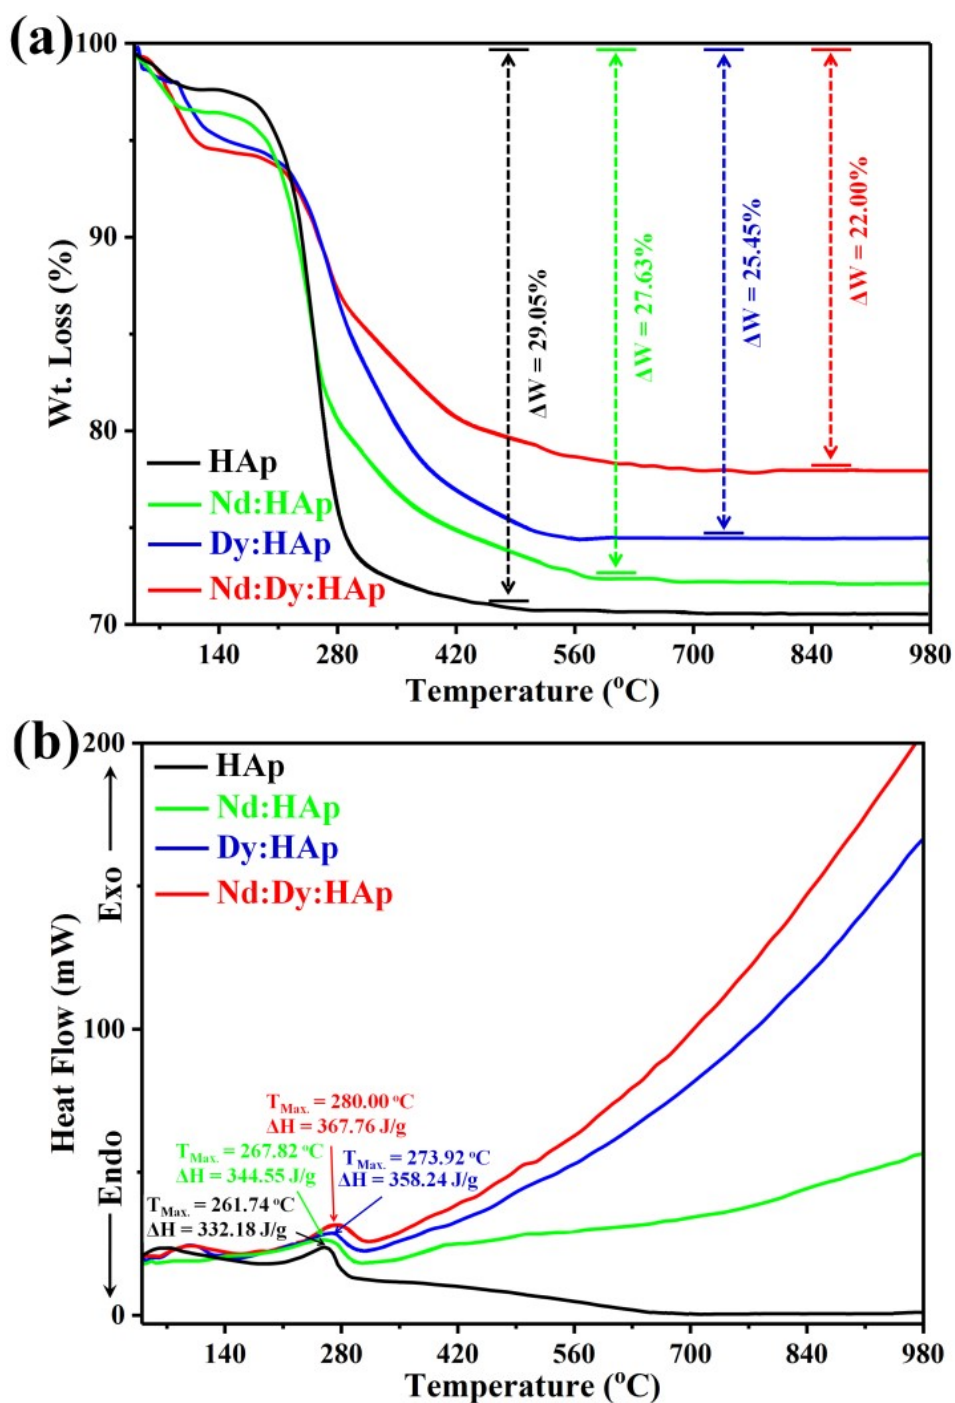

**Fig. S4** Plots of (a) TG % weight loss and (b) DTA heat flow of HAp, Nd:HAp, Dy:HAp, & Nd:Dy:HAp.

From Fig. S4(b), the weight reductions shown in the TG curves are precisely represented by the DTA curves of samples.<sup>5</sup> Both HAp and RE doped HAp NPs exhibited a broad and medium intensity exothermic peak at ~250–350 °C. This DTA peak is because of the intracrystalline water dehydration that results in partial oxy-HAp production.<sup>3,6</sup> Based on the exothermic peaks of the DTA curves, the temperature maximum ( $T_{\text{Max}}$ ) and change in the enthalpy ( $\Delta H$ ) of the transitions were determined for all the samples.<sup>5</sup> The exothermic peaks of HAp, Nd:HAp, Dy:HAp, and Nd:Dy:HAp have  $T_{\text{Max}}$  values of 261.74, 267.82, 273.92, and 280.00 °C and  $\Delta H$  values of 332.18, 344.55, 358.24, and 367.76 J/g, respectively. The addition of RE metals to the HAp crystal lattice resulted in an increase in  $T_{\text{Max}}$  and  $\Delta H$  values as well as a small shift in exothermic peaks to higher temperatures. Additionally, no further alterations to TG and DTA curves (600 to 1000 °C) suggest that the samples contain thermally stable HAp and RE doped HAp NPs.

## References

1. Md. Irfan, A. Jeshurun, P. S. Suprajaa and B. M. Reddy, *J. Mater. Sci. Surf. Eng.*, 2020, **7**, 938–943. [10.1016/j.jmsse/2348-8956/7-1.5](https://doi.org/10.1016/j.jmsse/2348-8956/7-1.5).
2. Md. Irfan, P. S. Suprajaa, R. Praveen and B. M. Reddy, *Mater. Lett.*, 2021, **282**, 128685. <https://doi.org/10.1016/j.matlet.2020.128685>.
3. S. Mondal, V. T. Nguyen, S. Park, J. Choi, L. H. Tran, M. Yi, J. H. Shin, C. -Y. Lee, J. Oh, *Ceram. Int.*, 2020, **46**, 16020–16031. <https://doi.org/10.1016/j.ceramint.2020.03.152>.
4. I. Mohammad, A. Jeshurun, P. Ponnusamy and B.M. Reddy, *Mater. Today Commun.*, 2022, **331**, 04788. <https://doi.org/10.1016/j.mtcomm.2022.104788>.
5. J. Klinkaewnarong, E. Swatsitang and S. Maensiri, *Solid State Sci.*, 2009, **11**, 1023–1027. <https://doi.org/10.1016/j.solidstatesciences.2009.02.003>.
6. H. E. Khal and N. H. Batis, *New J. Chem.*, 2015, **39**, 3597–3607. <https://doi.org/10.1039/C4NJ01836B>.
