# Supplementary material for: Microwave-assisted synthesis of dual responsive luminomagnetic rare earth metal ions (Nd3+, Dy3+) co-doped nanohydroxyapatite for biomedical applications
Source: Royal Society of Chemistry journal article supplement (doi:10.1039/d4dt02664k), 2025-01-01
Supplement: d4dt02664k2.pdf [file d4dt02664k2.pdf]

# Electronic Supplementary Information

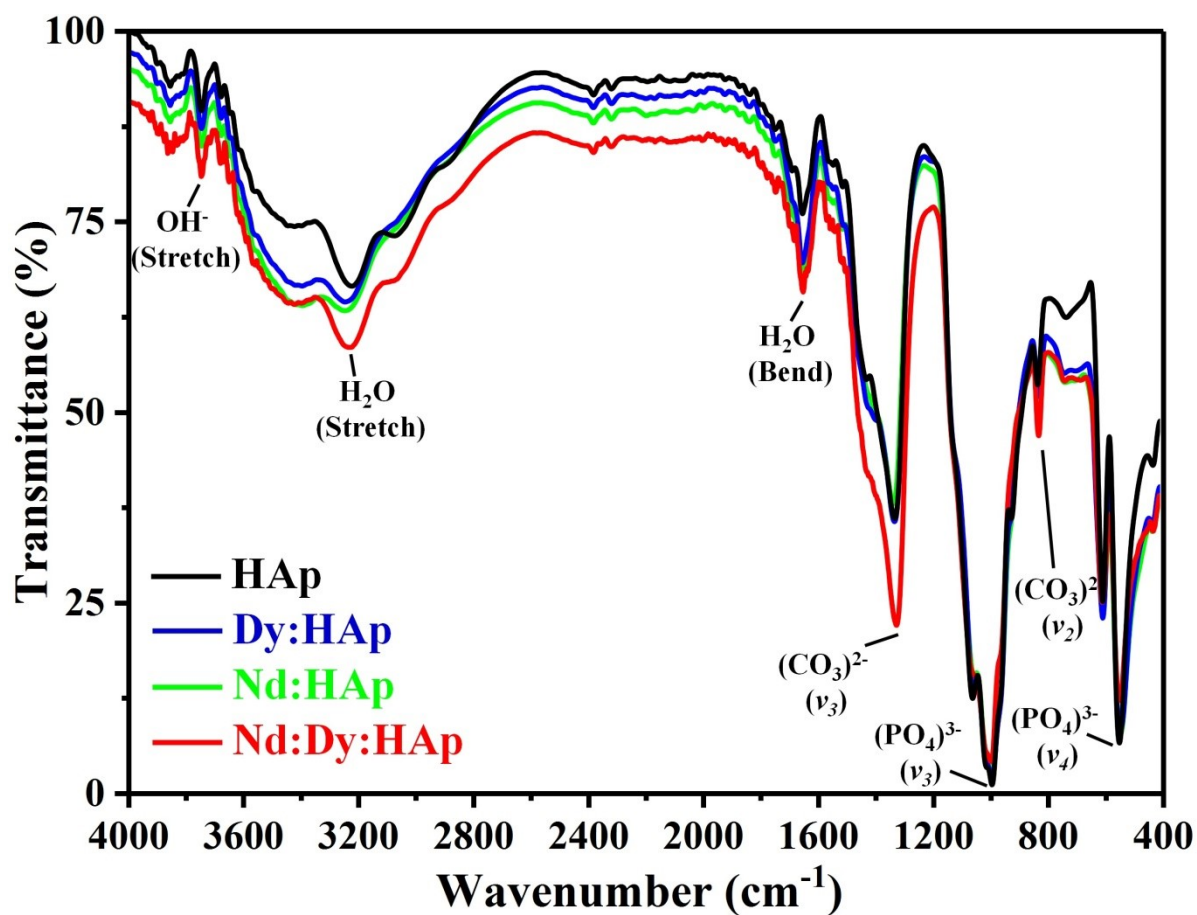

Fig. S1 FT-IR spectra of HAp, Nd:HAp, Dy:HAp, and Nd:Dy:HAp samples.

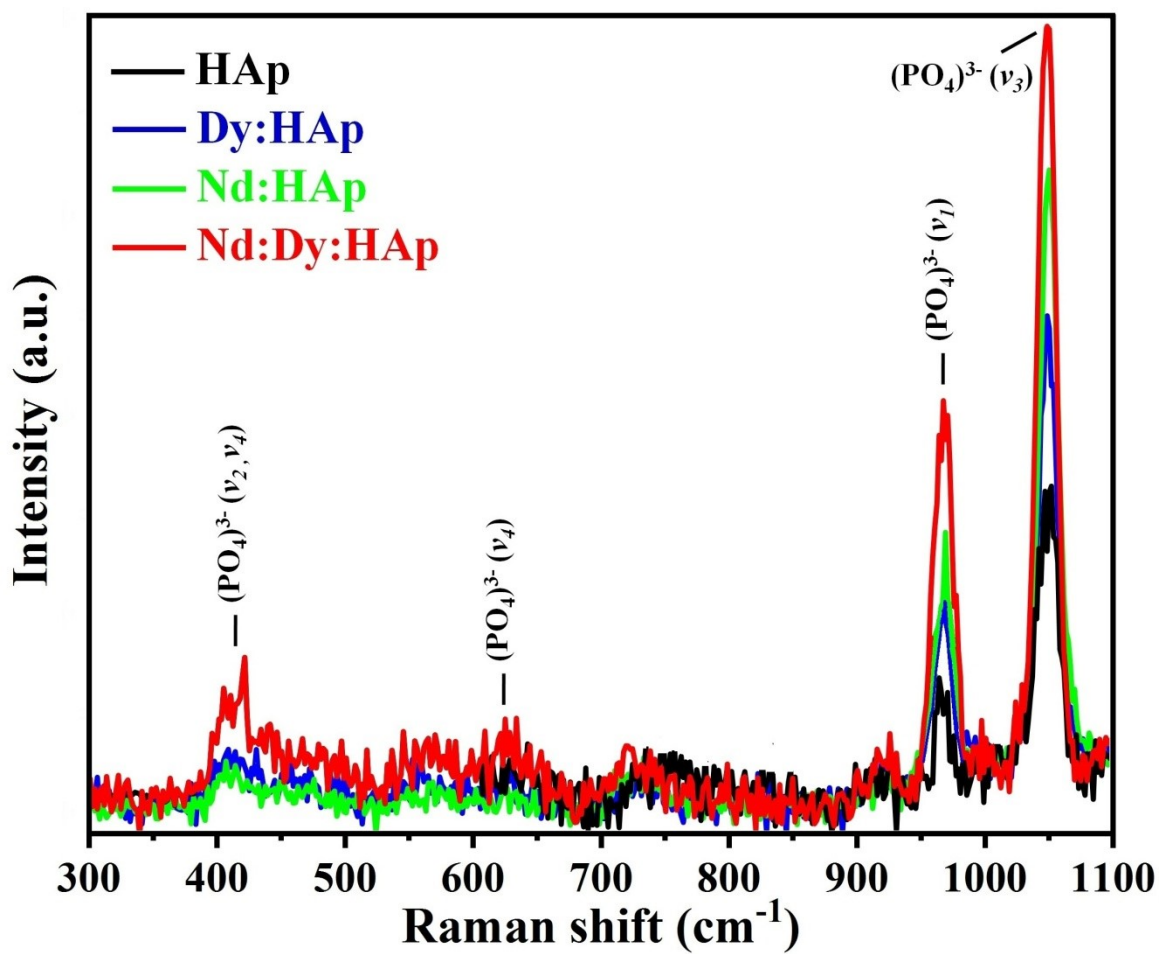

Fig. S2 Raman spectra of HAp, Nd:HAp, Dy:HAp, and Nd:Dy:HAp samples.

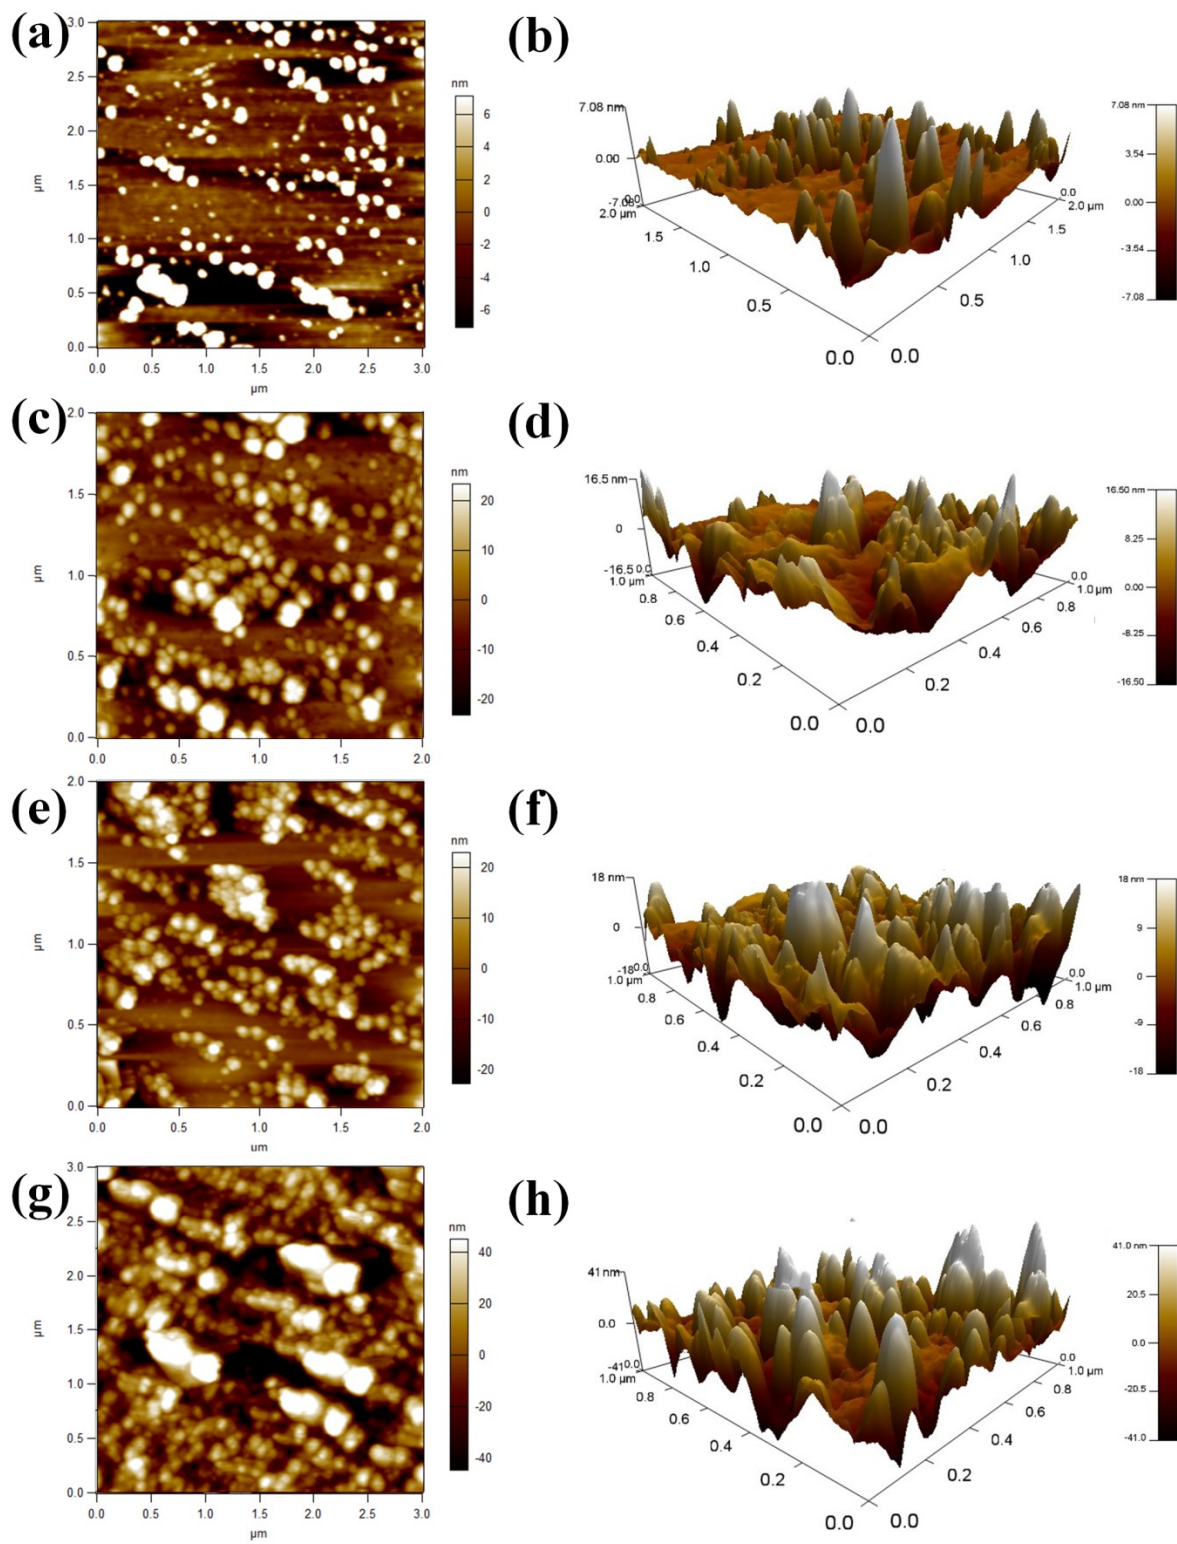

**Fig. S3** AFM images (2D & 3D) of (a, b) HAp, (c, d) Nd:HAp (e, f) Dy:HAp, & (g, h) Nd:Dy:HAp.

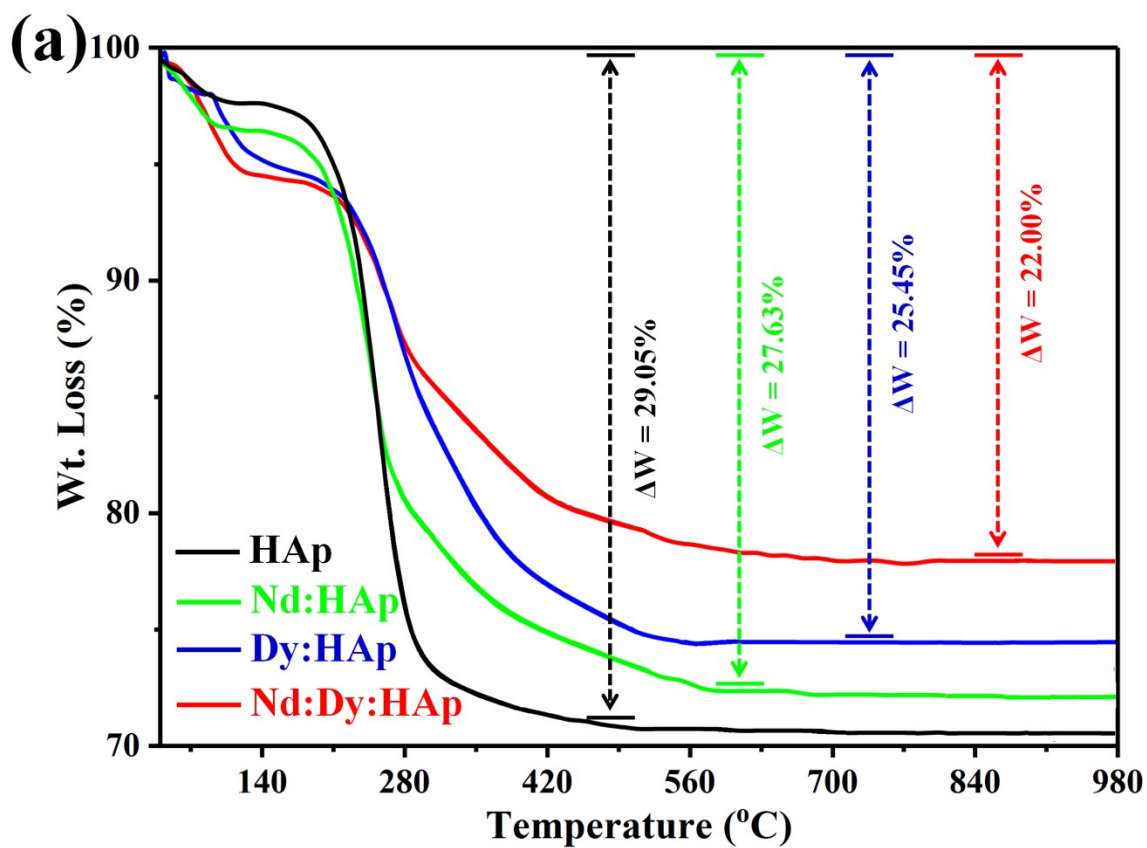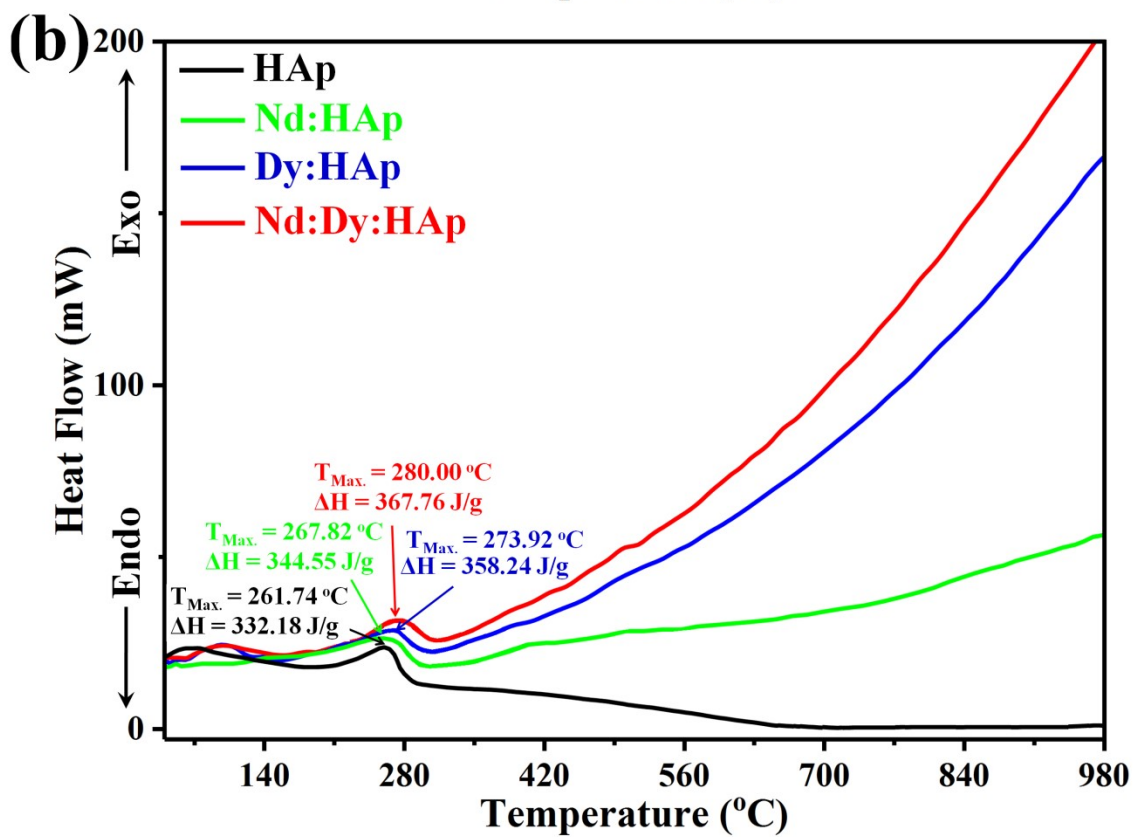

Fig. S4 Plots of (a) TG % weight loss and (b) DTA heat flow of HAp, Nd:HAp, Dy:HAp, & Nd:Dy:HAp.
